# Supplementary material for: Non-typeable pneumococci circulating in Portugal are of cps type NCC2 and have genomic features typical of encapsulated isolates
Source: PubMed Central journal article supplement (PMC4200197; doi:10.1186/1471-2164-15-863), 2014-10-06
Supplement: 12864_2014_6549_MOESM1_ESM.pdf [file 12864_2014_6549_MOESM1_ESM.pdf]

# Additional file 1

---

| <b>Strain</b>    | <b>Serotype</b> | <b>MLST</b> | <b>Reference</b> |
|------------------|-----------------|-------------|------------------|
| <b>TIGR4</b>     | 4               | 205         | [50]             |
| <b>D39</b>       | 2               | 595         | [49]             |
| <b>R6</b>        | -               | 595         | [48]             |
| <b>CBR206</b>    | 19F             | 179         | [54]             |
| <b>LGST215</b>   | 19F             | 179         | [55]             |
| <b>Sp3-BS71</b>  | 3               | 180         | [52]             |
| <b>Sp14-BS69</b> | 14              | 124         | [52]             |
| <b>BHN100</b>    | 19F             | 162         | [53]             |
| <b>BHN191</b>    | 6B              | 138         | [51]             |
| <b>BHN418</b>    | 6B              | 138         | [51]             |

---
