# Supplementary material for: Non-typeable pneumococci circulating in Portugal are of cps type NCC2 and have genomic features typical of encapsulated isolates
Source: PubMed Central journal article supplement (PMC4200197; doi:10.1186/1471-2164-15-863), 2014-10-06

# Additional file 3

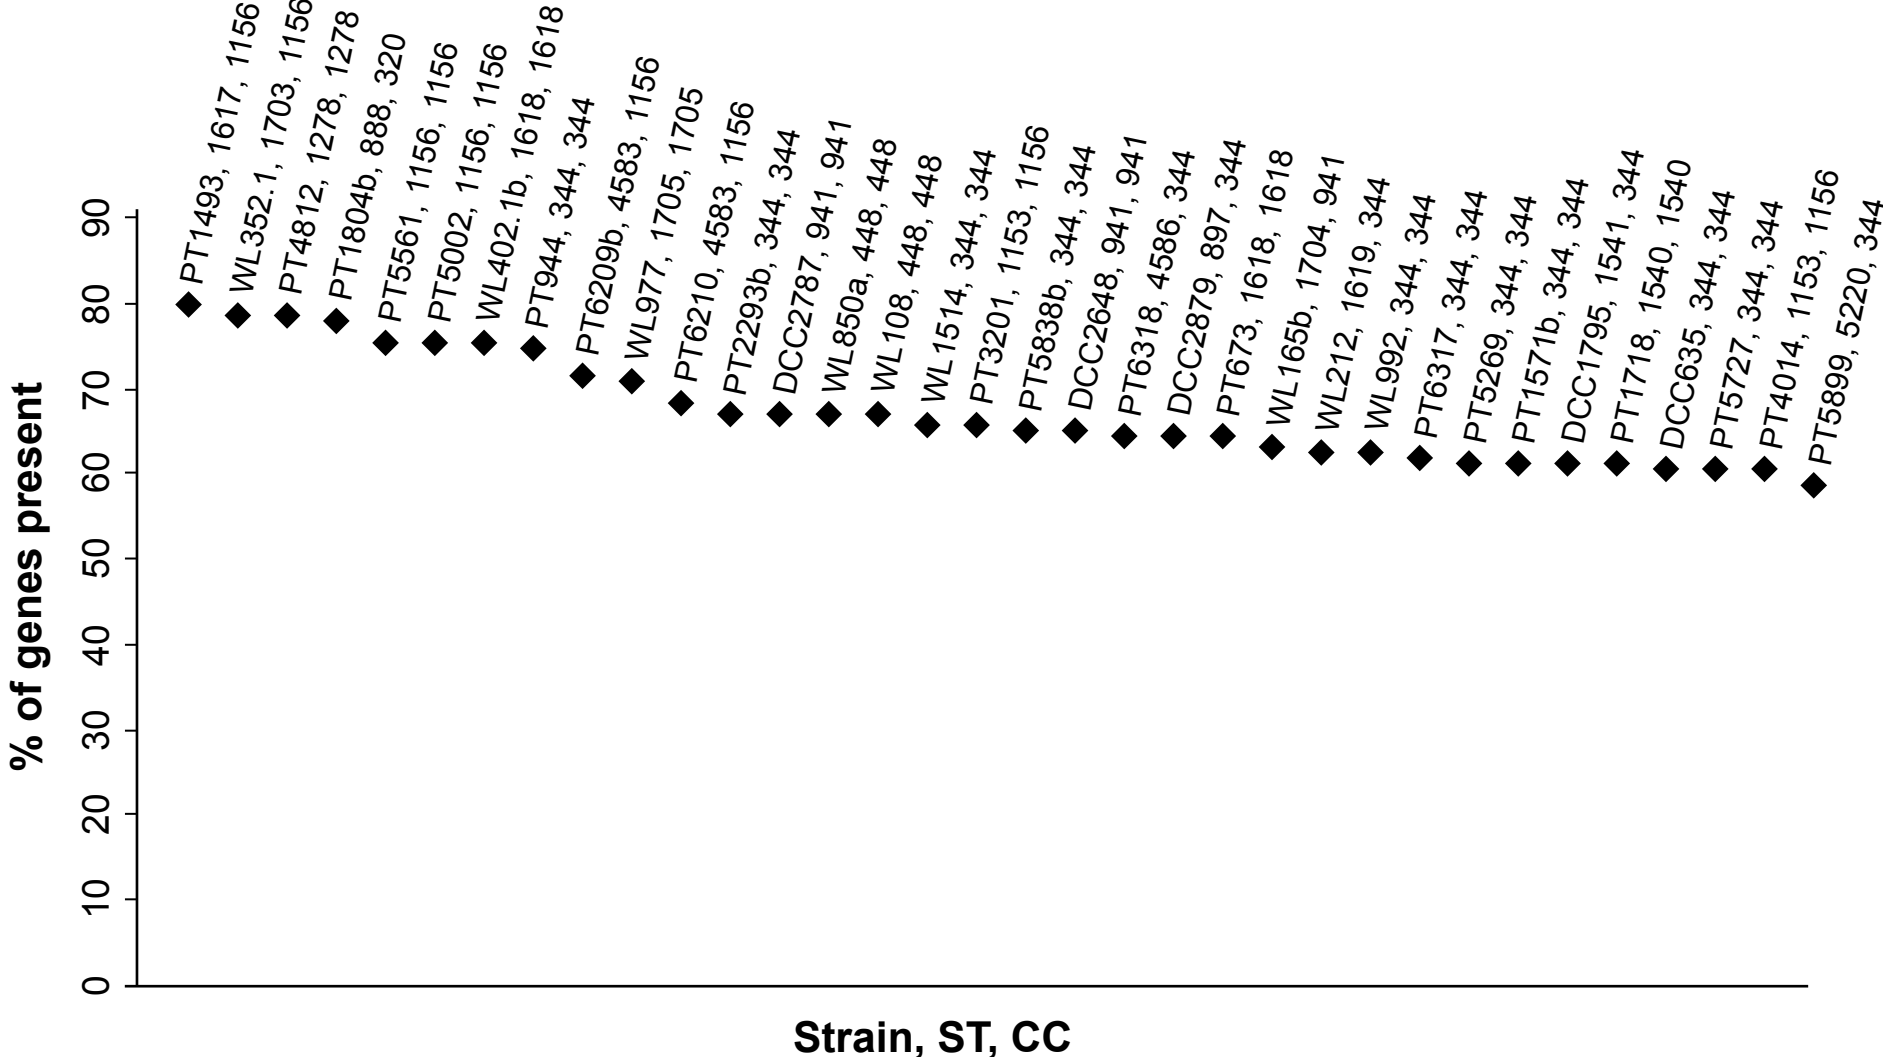

Supplement: 12864_2014_6549_MOESM3_ESM.pdf [file 12864_2014_6549_MOESM3_ESM.pdf]
