# Supplementary material for: Non-typeable pneumococci circulating in Portugal are of cps type NCC2 and have genomic features typical of encapsulated isolates
Source: PubMed Central journal article supplement (PMC4200197; doi:10.1186/1471-2164-15-863), 2014-10-06
Supplement: 12864_2014_6549_MOESM5_ESM.pdf [file 12864_2014_6549_MOESM5_ESM.pdf]

## Additional file 5

| <b>Primer</b>    | <b>Sequence</b>        | <b>Reference</b> |
|------------------|------------------------|------------------|
| <b>cap F</b>     | GTTKTGGCTAACTTGTCCAATG | [46]             |
| <b>cps 1R</b>    | TGAGCTGTATAGGCGTGGCG   | this paper       |
| <b>cps 1F</b>    | AATCGCCACGCCTATACAGC   | this paper       |
| <b>cps 2R</b>    | GATACTGAGCATTTCGATTCC  | this paper       |
| <b>cps 2F</b>    | AGCGGCCTTCAAAAAGTGGC   | this paper       |
| <b>cps 3R</b>    | TACGGATGGTCAATTCTTGG   | this paper       |
| <b>cps 3F</b>    | GACCAAGAATTGACCATCCG   | this paper       |
| <b>cps 4R</b>    | ATCCAAGCCTGTGCTTCAGC   | this paper       |
| <b>cps 4F</b>    | ATGCTGAAGCACAGGCTTGG   | this paper       |
| <b>cps 5R</b>    | ATATGAGCCGTTTGCTCAGC   | this paper       |
| <b>cps 5F</b>    | AAGATTGCTGAGCAAACGGC   | this paper       |
| <b>cps 6R</b>    | GCAGCTAAAACACCAGCTGC   | this paper       |
| <b>cps 6F</b>    | GCAGCTGGTGTTTTAGCTGC   | this paper       |
| <b>cap R</b>     | CTGTCAACCAAGCTTGGGC    | [46]             |
| <b>cps 7F</b>    | AAGTGGCTCTTAGGAGCAGG   | this paper       |
| <b>cps 7F_2</b>  | GGTAAATGTCAAGCGACCC    | this paper       |
| <b>cps 7R</b>    | GAGTTGGCGCTCCGTAATCC   | this paper       |
| <b>cps 8F</b>    | GTCTATAGTCCACAAGAGGC   | this paper       |
| <b>cps 9F</b>    | TACCAAAGCTTATTCACAGG   | this paper       |
| <b>cps10F</b>    | CACGCCCAGAACCTTACTGG   | this paper       |
| <b>cps 11R</b>   | GCTTTCTTGCTCCCATTTGG   | this paper       |
| <b>cps 12F</b>   | AGCTAATTACAAGGGTAGCC   | this paper       |
| <b>cps 12R</b>   | AAAGGGTGGAAGGTCAGTCG   | this paper       |
| <b>cps 13F</b>   | GTTAGAATACCGTAGTCTTCG  | this paper       |
| <b>cps 13R</b>   | ACTGGTGTTGACGAGGTGGC   | this paper       |
| <b>cps 14R</b>   | TTAGTTTCAATCACCGAAGC   | this paper       |
| <b>cps 15F</b>   | GCTATCAACCATACGAGC     | this paper       |
| <b>cps 16F</b>   | GGAAACAGCTAGTCTGTTGG   | this paper       |
| <b>cps 16R</b>   | GCTTGCTCAAACCATTCAAGC  | this paper       |
| <b>cps 17F</b>   | CAGAAGAGMAYYTMGTTGGC   | this paper       |
| <b>cps 17F_2</b> | CAGAAGAGAACCTATGTTGGC  | this paper       |
| <b>cps 18F</b>   | GTTAGCAAGTTCGTCTAAGG   | this paper       |
| <b>cps 18R</b>   | TTCTGCATCTAGTAGGATGC   | this paper       |
| <b>cps 19F</b>   | CCTCTAGCTAATTACAAGGG   | this paper       |
| <b>cps 19R</b>   | TGATGATAAAGGGTGAAGG    | this paper       |
| <b>cps 20F</b>   | GTATTCTCTATAGCGGACC    | this paper       |
| <b>cps 20R</b>   | GTGTGATTGTAAGCCTTACG   | this paper       |
