# Supplementary material for: Non-typeable pneumococci circulating in Portugal are of cps type NCC2 and have genomic features typical of encapsulated isolates
Source: PubMed Central journal article supplement (PMC4200197; doi:10.1186/1471-2164-15-863), 2014-10-06
Supplement: 12864_2014_6549_MOESM6_ESM.pdf [file 12864_2014_6549_MOESM6_ESM.pdf]

# Additional file 6

| Strain           | No. ORFs in array | False negatives             | Signal intensity | Description                             |
|------------------|-------------------|-----------------------------|------------------|-----------------------------------------|
| <b>TIGR4</b>     | 2,238             | SP_1217                     | 459              | Hypothetical protein                    |
|                  |                   | SP_1921                     | 442              | Hypothetical protein                    |
| <b>R6</b>        | 113               | Not hybridised <sup>a</sup> |                  |                                         |
| <b>D39</b>       | 13                | None                        |                  |                                         |
| <b>BHN100</b>    | 192               | BHN100_0544                 | 392              | Glutamyl aminopeptidase                 |
|                  |                   | BHN100_1337                 | 118              | Caax amino protease                     |
|                  |                   | BHN100_2111                 | 12               | Transposase                             |
|                  |                   | BHN100_2148                 | 361              | Transposase                             |
|                  |                   | BHN100_2155                 | 348              | Transposase                             |
| <b>CBR206</b>    | 170               | CBR206_1142                 | 282              | Tn5252                                  |
|                  |                   | CBR206_1354                 | 246              | Hypothetical protein                    |
|                  |                   | CBR206_2210                 | 56               | Hypothetical protein                    |
|                  |                   | CBR206_2248                 | 330              | Phage holing                            |
| <b>LGST215</b>   | 4                 | None                        |                  |                                         |
| <b>BHN191</b>    | 178               | BHN191_0760                 | 446              | EcoBI specificity protein               |
|                  |                   | BHN191_0783                 | 91               | Hypothetical protein                    |
|                  |                   | BHN191_2196                 | 6                | Cell wall surface anchor family protein |
| <b>BHN418</b>    | 1                 | None                        |                  |                                         |
| <b>Sp14-BS69</b> | 92                | SP14_0054                   | 361              | Gp18                                    |
|                  |                   | SP14_1091                   | 121              | Hypothetical protein                    |
| <b>Sp3-BS71</b>  | 51                | None                        |                  |                                         |
| Total ORFs       | 3,052             |                             |                  |                                         |
